# Supplementary material for: Effect of ferrous sulfate treatment on microbially influenced corrosion of CuNi 70/30 marine pipeline alloy by sulfate reducing bacteria
Source: Royal Society of Chemistry journal article supplement (doi:10.1039/d4ew00382a), 2024-01-01
Supplement: d4ew00382a1.pdf [file d4ew00382a1.pdf]

## Effect of ferrous sulfate treatment on microbially influenced corrosion of CuNi 70/30 alloy by sulfate reducing bacteria

MA Javed<sup>1</sup>, WC Neil<sup>2</sup>, SA Wade<sup>1</sup>

<sup>1</sup>School of Science, Computing and Engineering Technologies, Swinburne University of Technology, Melbourne Australia

<sup>2</sup>Defence Science technology Group, Melbourne, Australia

### Supplementary Data

**Table 1s.** Chemical composition of the potable water and natural seawater used for FeSO<sub>4</sub> solution preparation in this study.

| Test                 | Units    | Seawater | Potable water |
|----------------------|----------|----------|---------------|
| Chloride             | mg/L     | 11000    | 9.1           |
| Calcium              | mg/L     | 250      | 4.5           |
| Magnesium            | mg/L     | 750      | 1.6           |
| Potassium            | mg/L     | 250      | 0.8           |
| Sodium               | mg/L     | 6100     | 5.6           |
| Iron                 | mg/L     | < 0.05   | < 0.05        |
| Phosphate            | mg/L     | 0.07     | <0.05         |
| Sulphate             | mg/L     | 1600     | <5            |
| Nitrate              | mg/L     | 0.40     | 0.37          |
| Salinity             | mg/L     | 23000    | 90            |
| Total alkalinity     | mg/L     | 120      | < 20          |
| Total organic carbon | mg/L     | < 5      | < 5           |
| pH                   | pH units | 7.9      | 6.6           |
| Conductivity         | μS/cm    | 39000    | 78            |

**Table 2s.** Chemical composition of agar plates used for spread plating SRB cells.

| Chemical                                                             | Amount (per L) |
|----------------------------------------------------------------------|----------------|
| Tryptic soy agar                                                     | 45.0 g         |
| MgSO <sub>4</sub> ·7H <sub>2</sub> O                                 | 2.0 g          |
| Sodium lactate                                                       | 4 mL           |
| 5% Fe(NH <sub>4</sub> ) <sub>2</sub> (SO <sub>4</sub> ) <sub>2</sub> | 0.05 %         |

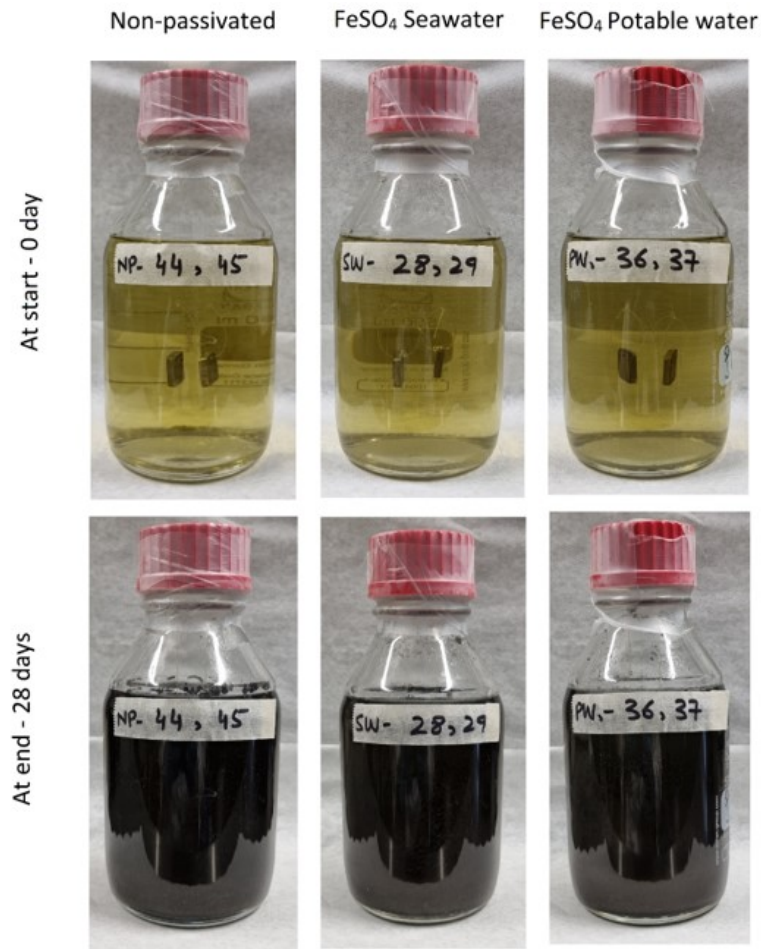

**Figure 1s.** A photo showing example of different coupons suspended inside glass bottles during both the initial and final stages of a 28 day immersion test in MB medium with SRB.

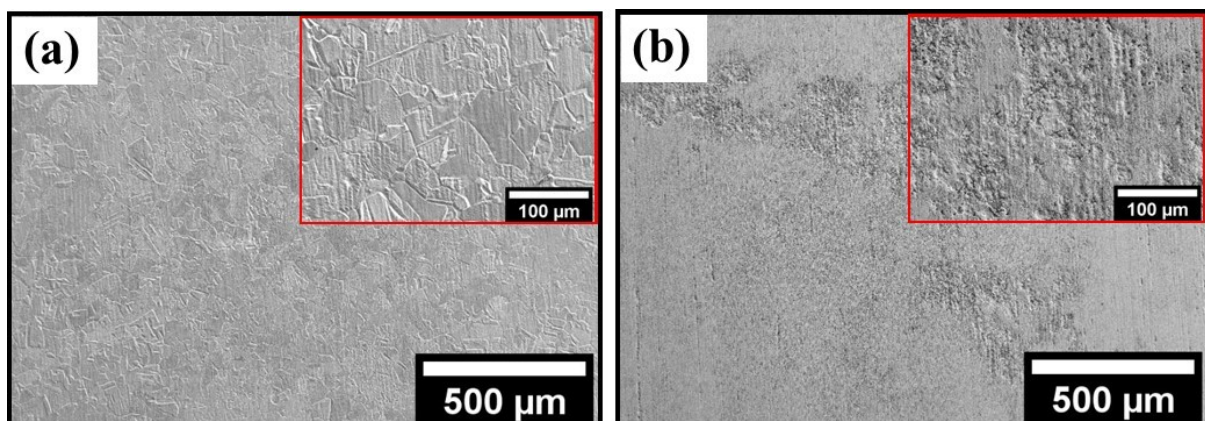

**Figure 2s.** SEM images after removal of surface film formed on coupons treated with (a) FeSO<sub>4</sub> seawater and (b) FeSO<sub>4</sub> potable water for 5 days. The insets provide higher magnification images of the corresponding coupon surface.

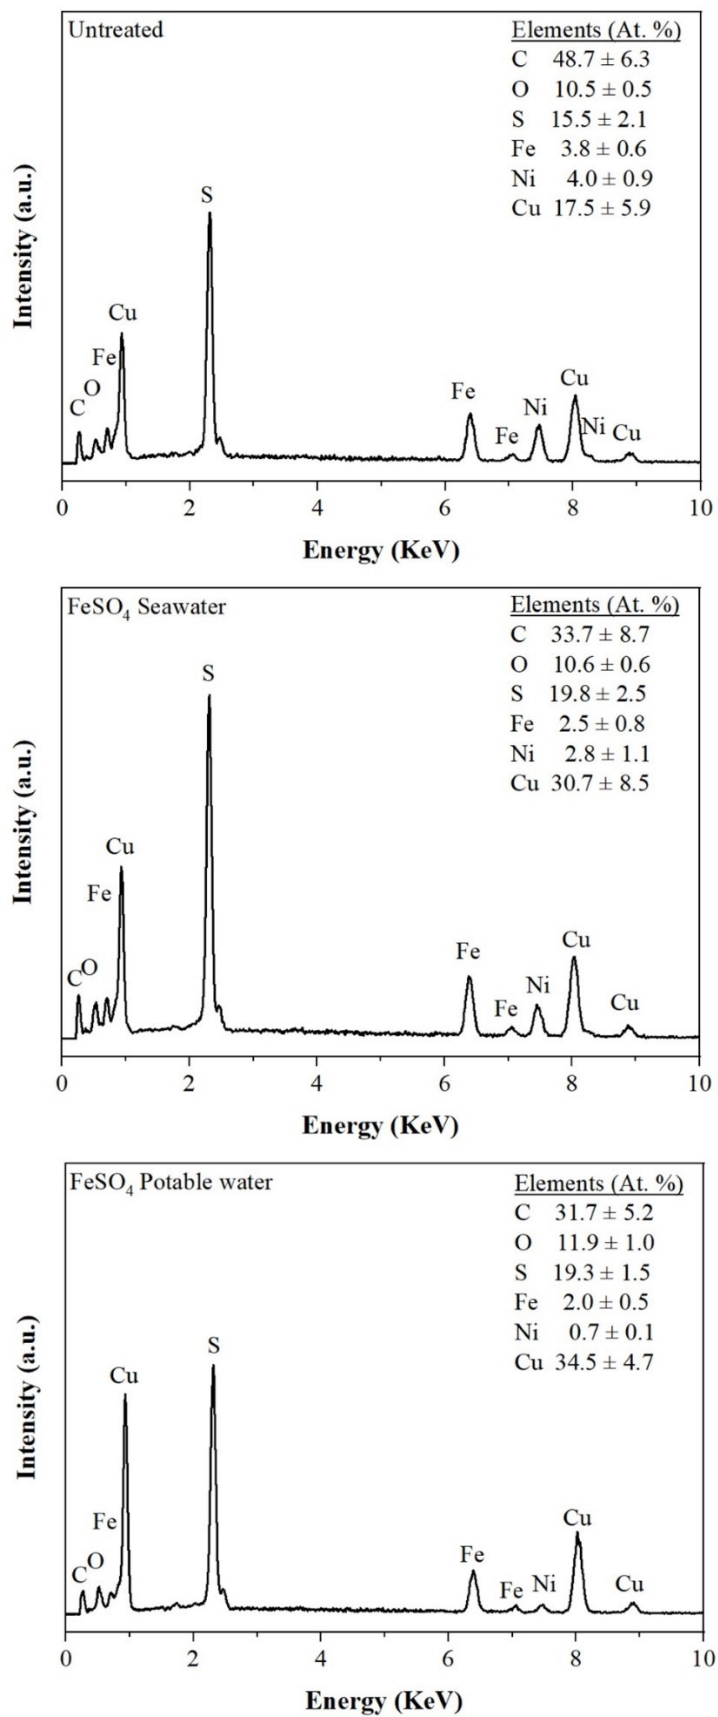

**Figure 3s.** EDS spectra of biofilm formed on untreated and FeSO<sub>4</sub> treated coupons after 28 days of immersion testing in MB medium with SRB.

(a) FeSO<sub>4</sub> seawater treated coupon

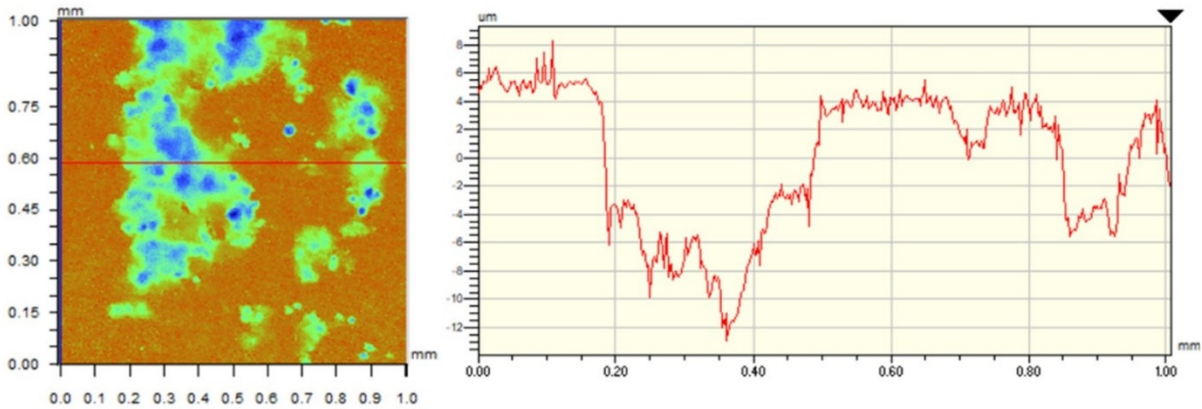

(b) FeSO<sub>4</sub> potable water treated coupon

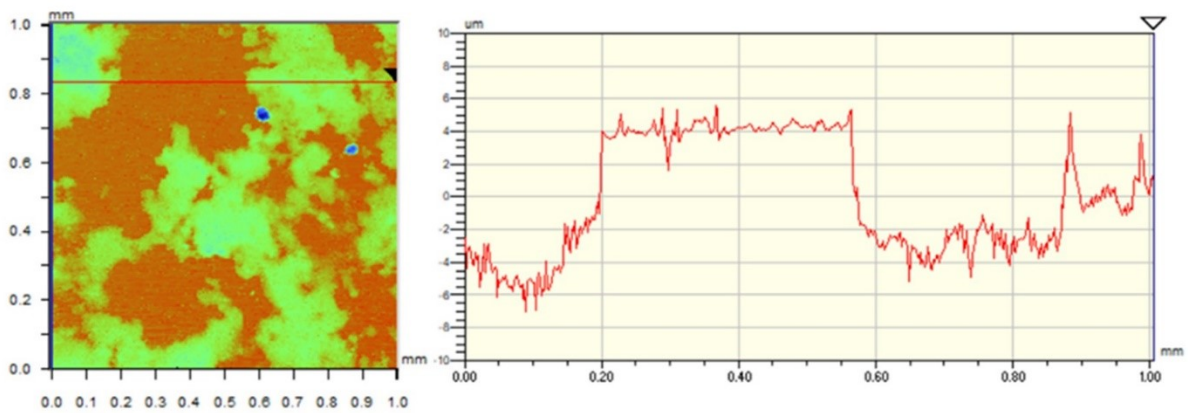

**Figure 4s.** 3D optical profilometer images (left) and horizontal line profiles (right) showing extent of general (uniform) corrosion attack on the surface of (a) FeSO<sub>4</sub> seawater treated coupon (b) FeSO<sub>4</sub> potable water treated coupon.

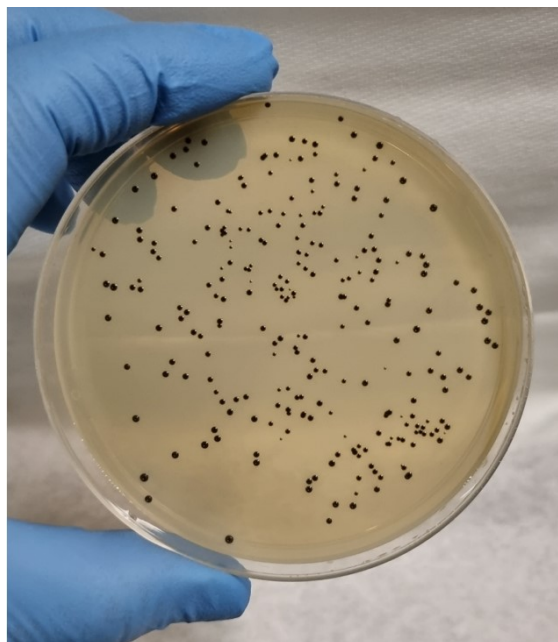

**Figure 5s.** Example of black color SRB colonies grown on TSA plus salt medium agar plates.
